# Supplementary material for: Doping controlled Fano resonance in bilayer 1T′-ReS2: Raman experiments and first-principles theoretical analysis
Source: Royal Society of Chemistry journal article supplement (doi:10.1039/d0nr06583h), 2020-12-08
Supplement: d0nr06583h1.pdf [file d0nr06583h1.pdf]

## Supplemental Material

### Doping controlled Fano resonance in bilayer 1T'-ReS<sub>2</sub>: Raman experiments and first-principles theoretical analysis

Subhadip Das<sup>1</sup>, Suchitra Prasad<sup>2</sup>, Biswanath Chakraborty<sup>1,3</sup>, Bhakti Jariwala<sup>4</sup>, Sai Shradha<sup>4</sup>, D. V. S. Muthu<sup>1</sup>, Arnab Bhattacharya<sup>4</sup>, U. V. Waghmare<sup>2</sup> and A. K. Sood<sup>1\*</sup>

<sup>1</sup>*Department of Physics, Indian Institute of Science, Bangalore 560012, India*

<sup>2</sup>*Theoretical Sciences Unit, Jawaharlal Nehru Centre for Advanced Scientific Research, Bangalore 560064, India*

<sup>3</sup>*Present address: Department of Physics, Indian Institute of Technology Jammu, Jammu-181221, J&K, India*

<sup>4</sup>*Department of Condensed Matter Physics and Materials Science, Tata Institute of Fundamental Research, Mumbai 400005, India.*

---

\* asood@iisc.ac.in

### I. Polar plots of the out-of-plane Raman modes

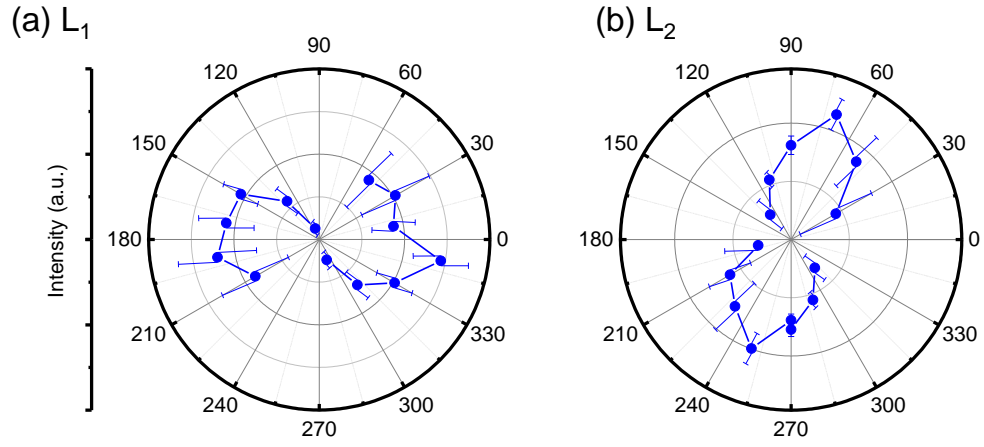

Fig. S1: (a) Raman intensity variation of the  $A_g$ -like (a)  $L_1$  and (b)  $L_2$  modes with laser polarization angle  $\theta$  in unpolarized collection configuration. Intensities of the peaks have been normalized using angular dependence of Si peak at  $\sim 520.5 \text{ cm}^{-1}$ .

## II. Additional transport data and EPC analysis of $143 \text{ cm}^{-1}$ mode of bilayer $\text{ReS}_2$

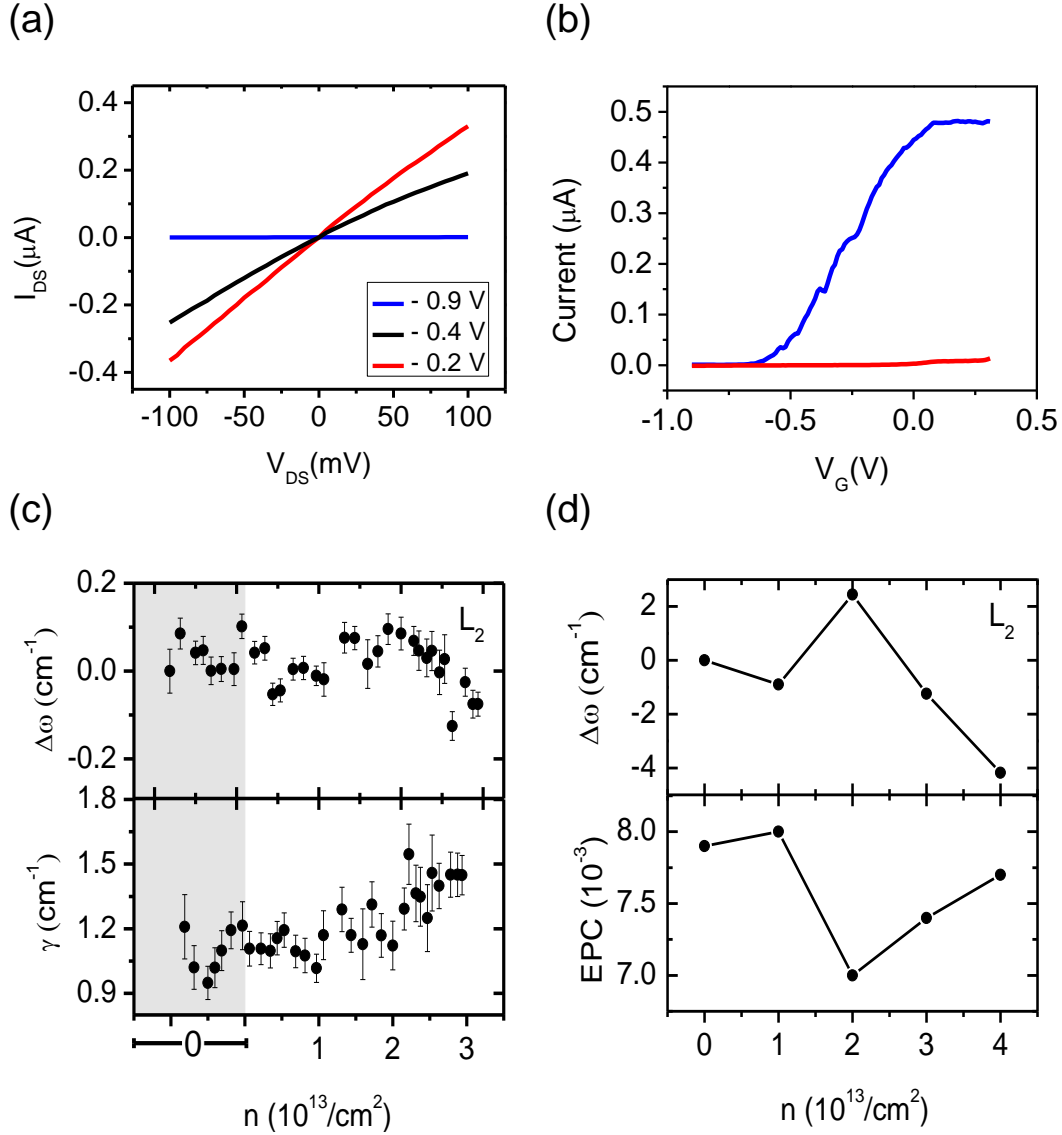

Fig. S2: (a) Drain current ( $I_{DS}$ ) versus drain voltage ( $V_{DS}$ ) at three different gate voltages. (b) Negligible gate to source current (red line) compared to the drain to source (blue line) current at  $0.1 \text{ V}$  of drain to source voltage, confirming the absence of Faradaic current in our device transport measurements from Figs. 1(d) and (e) of the main text. (c) Experimental measurements of the frequency shift ( $\Delta\omega = \omega(n \neq 0) - \omega(n = 0)$ ) and linewidth ( $\gamma$ ) with electron doping ( $n$ ) of the  $L_2$  mode at  $\theta = 90^\circ$ . Gray region represents the transistor off-state ( $V_G \leq V_{Th}$ ). (d) Calculated values of  $\Delta\omega$  and EPC for the  $L_2$  mode with  $n$ .

### III. Behavior of the in-plane modes at $\theta = 90^\circ$

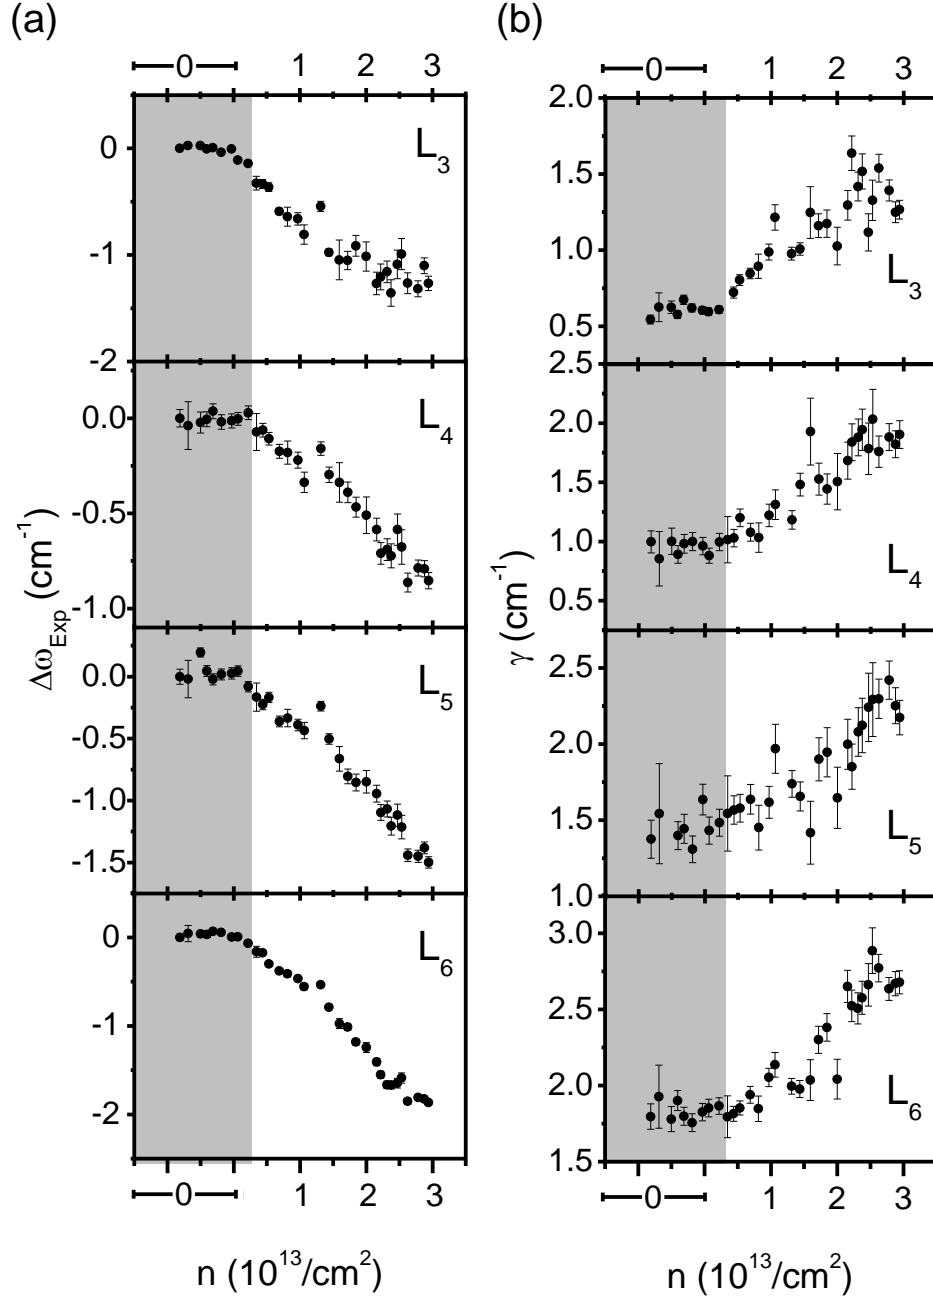

Fig. S3: (a)  $\Delta\omega$  and  $\gamma$  versus  $n$  at  $\theta = 90^\circ$  for the  $E_g$ -like modes.

#### IV. EPC measurement of trilayer ReSe<sub>2</sub>

Using similar methods for experimental measurements and theoretical calculations used for bilayer ReS<sub>2</sub> (described in the main text), we have repeated our work on a trilayer ReSe<sub>2</sub> transistor. ReSe<sub>2</sub> is isostructural to ReS<sub>2</sub> [1, 2], hence there are 18 Raman active mode with  $A_g$  symmetry [3]. Unlike ReS<sub>2</sub>, the Raman modes of ReSe<sub>2</sub> has not been yet classified as in-plane or out-of-plane modes. Atomic force microscopic measurement (inset of Fig. S4(a)) reveals  $\sim 2.3$  nm (3 layers) of sample thickness. Raman spectrum for trilayer ReSe<sub>2</sub> (Fig. S4(a)) shows 14 modes, which are labeled from  $N_1$  to  $N_{14}$ . The drain current ( $I_{DS}$ ) with gate voltage ( $V_G$ ) measurement (Fig. 4(b)) shows electron field-effect mobility of  $\sim 0.41$  cm<sup>2</sup>/V.s and current on-off ratio of  $\sim 10^2$ . Although these parameters are consistent with previous reports [4, 5], the n-type semiconducting behavior can be attributed to unintentional doping during growth process [4]. The Raman modes of trilayer ReSe<sub>2</sub> (Fig. S4(a)) at different gate voltages are fitted with a sum of Lorentzian functions to extract the phonon frequency ( $\omega$ ) and linewidth ( $\gamma$ ). All 14 modes show small changes in phonon frequency, with maximum phonon softening of  $\sim 0.6$  cm<sup>-1</sup> observed for  $N_7$ ,  $N_{11}$  and  $N_{12}$  modes at  $n \sim 5 \times 10^{13}$ /cm<sup>2</sup> (Figs. S5(a, b)). Similarly, the linewidth of all the modes (Figs. S6(a, b)) show little to no change with doping.

We find an indirect band gap of 0.93 eV and 1.02 eV of bulk ReSe<sub>2</sub> based on the calculation with and without the inclusion of spin-orbit coupling (SOC). Our results are in good agreement with the earlier theoretical and experimental findings of band gaps of bulk ReSe<sub>2</sub> [3, 6]. In trilayer ReSe<sub>2</sub>, we have tried three different ABA stacking configurations. We displaced the middle layer of ReSe<sub>2</sub> by three different distances ( $d$ ) and obtained the relative energy after  $z$ -direction relaxation. We find that the AAA stacking is the most stable of all (Table-S1). For trilayer ReSe<sub>2</sub>, we see an indirect band gap of 1.12 eV and VBM is a bit away from  $\Gamma$ -point (Fig. S7(a)). After including the SOC in our calculations, we get an indirect band gap of 1.03 eV, with the VBM at  $\Gamma$ -point (Fig. S7(b)). We determined the electronic structure of trilayer ReSe<sub>2</sub> in the ABA stacking configuration (stacking 2), which has lower energy than the other ABA stacking configuration. We find an indirect band gap of

1.13 eV for ABA stacking of trilayer ReSe<sub>2</sub> (Fig. S7(c)). Also, the electronic structure does not change much with the stacking sequence. Since, AAA stacking (stacking 0) is the most stable of all, we used it in finding the effects of electron doping. We see negligible softening of phonon modes with electron doping (Figs. S5(c, d)). In addition, all the phonon modes show relatively weak coupling with electrons (Figs. S6(c, d)).

The direct band gaps of ReS<sub>2</sub> and ReSe<sub>2</sub> at  $\Gamma$ -point are 1.32 eV and 1.22 eV respectively (Figs. 5(a) and S7(a)). In contrast to ReS<sub>2</sub>, ReSe<sub>2</sub> exhibits an indirect band gap of 1.12 eV (Fig. S7(a)). The VBM of ReS<sub>2</sub> has the highest density of states at  $\Gamma$ -point while, it is slightly offset from  $\Gamma$  in ReSe<sub>2</sub>. Phonon frequencies are derived from the interatomic force constants which are linear response functions having a dominant contribution from the phonon mediated coupling between electronic states at CBM and VBM. Upon electron doping, the valley of CBM at K-point of ReSe<sub>2</sub> gets populated, while that at  $\Gamma$ -point gets populated in ReS<sub>2</sub>. As a result, the frontier states at  $\Gamma$ -point are masked from contributing to phonon frequencies in ReS<sub>2</sub> resulting in changes in dominant terms in the interatomic force constant. Hence upon electron doping, a significant change in phonon frequencies of ReS<sub>2</sub> are observed, while little changes are seen in ReSe<sub>2</sub> (Fig. S8).

TABLE S1: Energies of stacking configurations (n), ( $E_n - E_0$ , N=1,2) and relative displacements (d) between the middle layer of ReSe<sub>2</sub> with respect to bottom layer of trilayer ReSe<sub>2</sub>.

| Stackings | Energy (eV) | d (Å)                |
|-----------|-------------|----------------------|
| 0         | 0           | (-0.67, -2.19, 6.35) |
| 1         | 0.34        | (-1.48, -0.77, 6.35) |
| 2         | 0.02        | (-2.30, 0.65, 6.35)  |

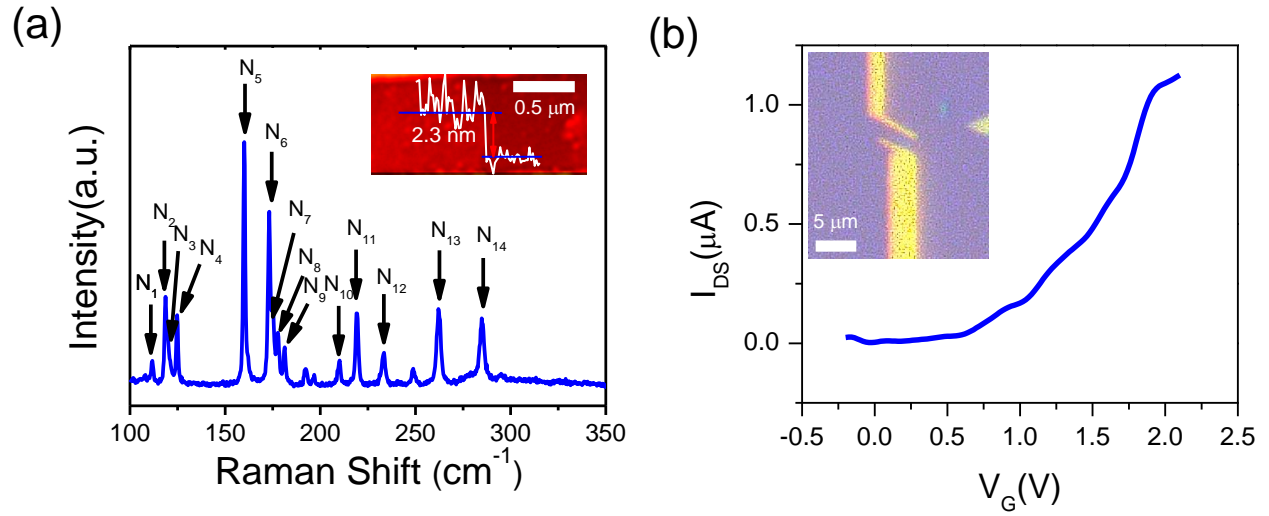

Fig. S4: (a) Raman spectrum of trilayer ReSe<sub>2</sub>. The modes are indicated as N<sub>1</sub> to N<sub>14</sub>. Inset image shows the AFM height profile. (b) Drain current ( $I_{DS}$ ) as a function of the gate voltage ( $V_G$ ) with drain voltage fixed at 0.4V. Inset shows the optical image of the device.

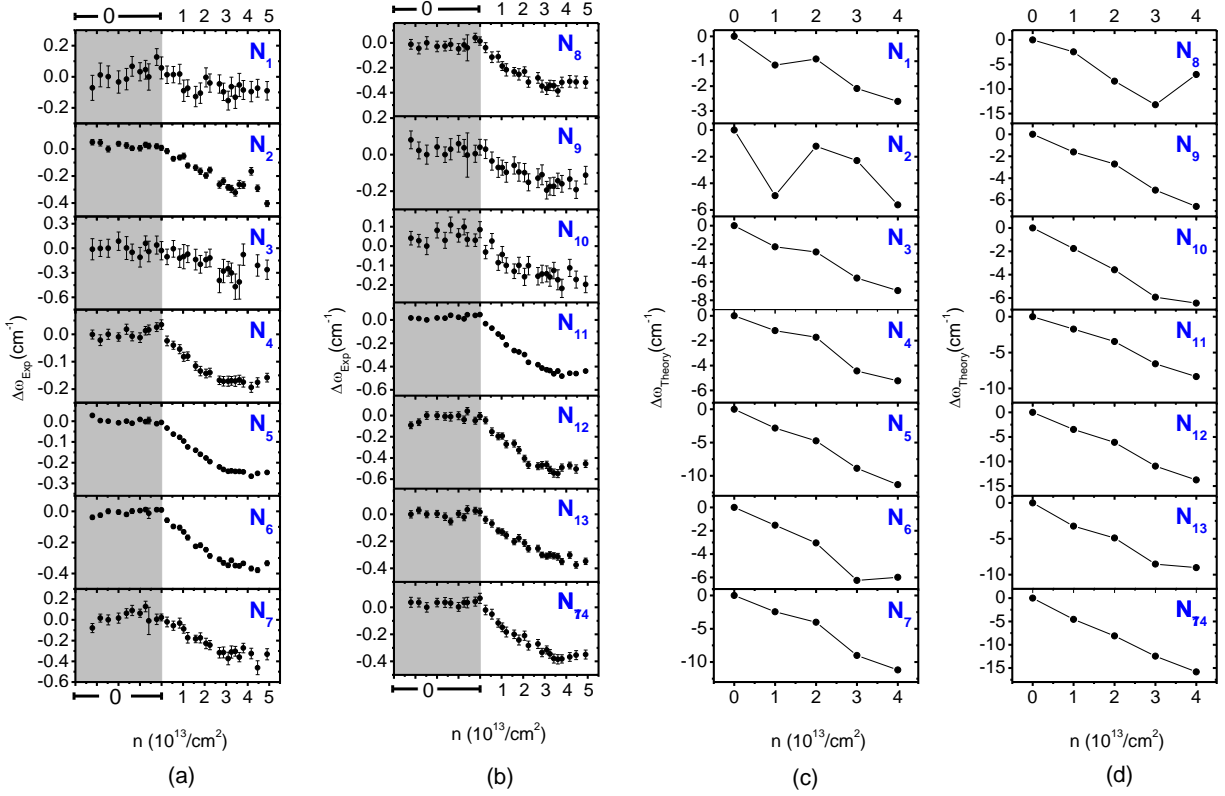

Fig. S5:  $\Delta\omega$  versus  $n$  from experimental measurements (a, b) and theoretical calculations (c, d) in trilayer  $\text{ReSe}_2$ . Gray region indicates undoped regime.



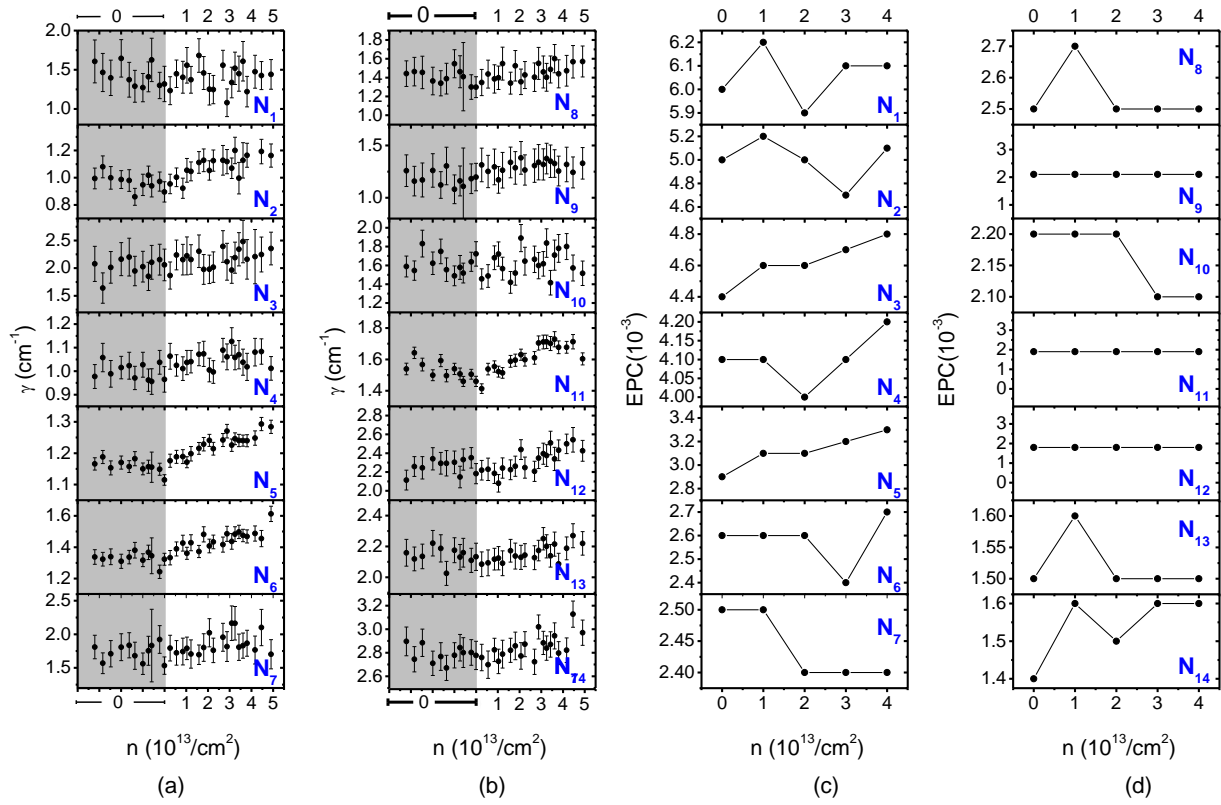

Fig. S6: Experimentally measured  $\gamma$  (a, b) and calculated EPC (c, d) versus  $n$ . Gray region represents undoped regime.

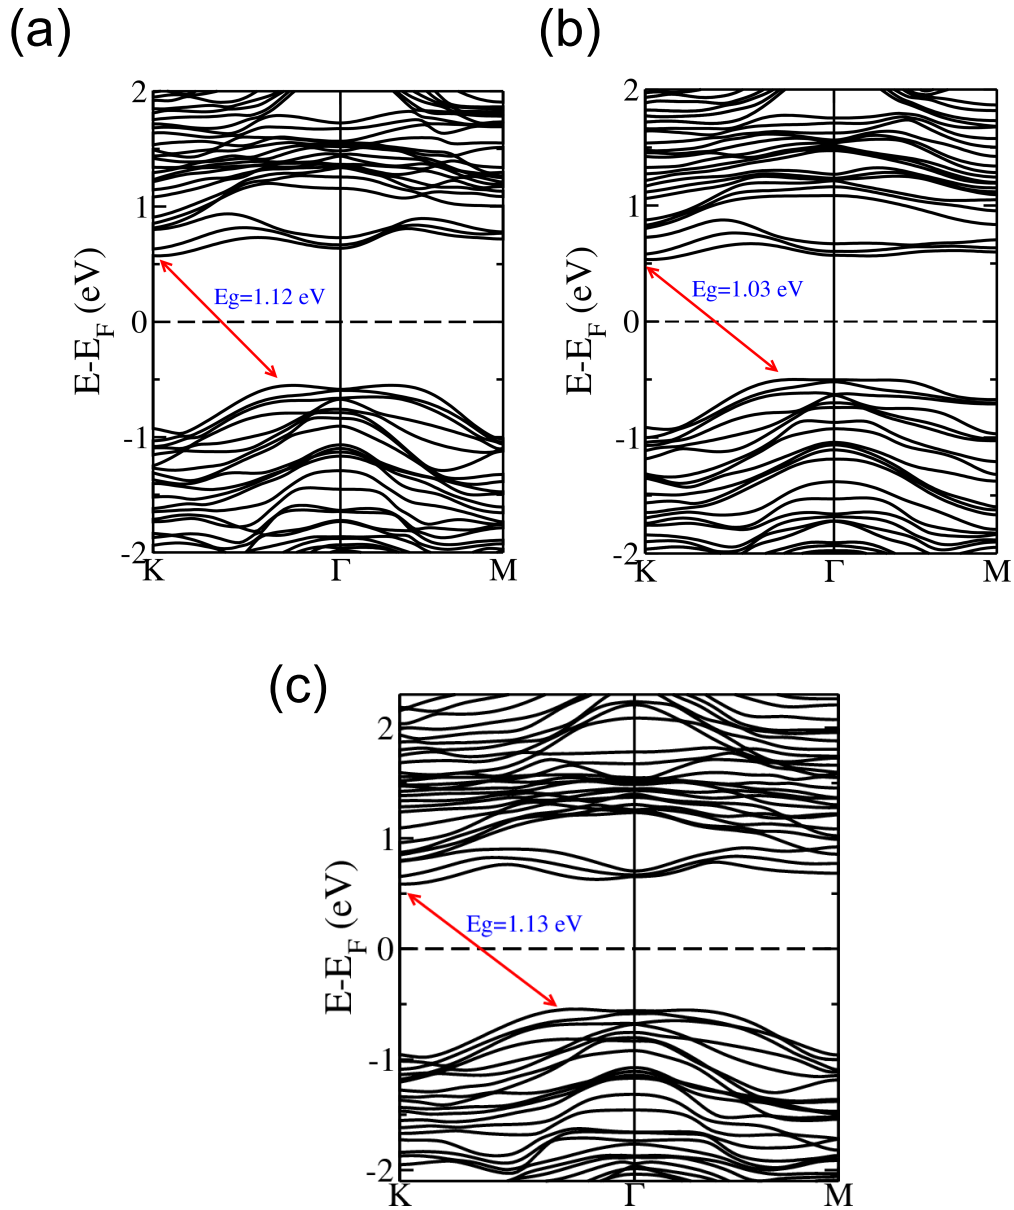

Fig. S7: Electronic structures of trilayer ReSe<sub>2</sub> in stacking configuration 0 obtained with (a)  $SOC = 0$ , (b)  $SOC \neq 0$ . (c) Electronic structure of trilayer ReSe<sub>2</sub> with stacking 2 obtained with  $SOC = 0$ .

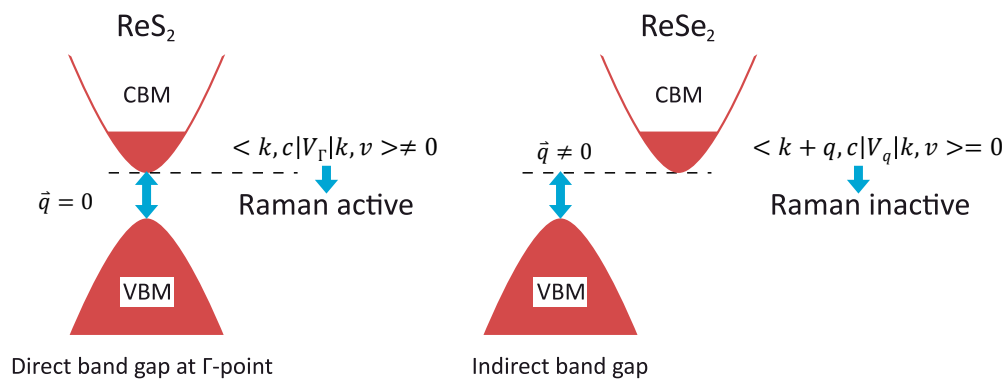

Fig. S8: Schematic illustration of the coupling of electrons with phonons in ReS<sub>2</sub> and ReSe<sub>2</sub>.

### V. Raman spectra at two different spots

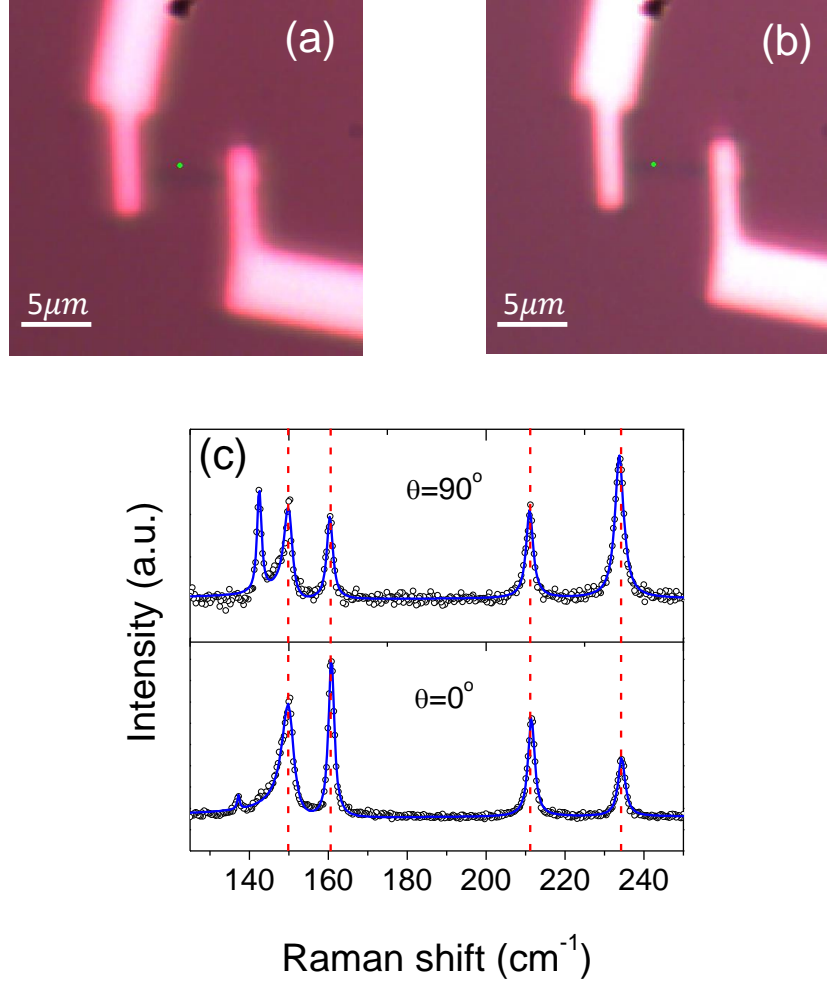

Fig. S9: Different incident laser positions shown by a green dot in the device optical images during (a) doping and (b) dedoping cycle. (c) Raman spectra with the same peak positions taken on these two spots at  $n \sim 3 \times 10^{13}/\text{cm}^2$  during doping and dedoping cycles at  $\theta = 90^\circ$  and  $0^\circ$ , respectively. Black circles and blue lines are the experimental data points and their cumulative peak fits respectively. As evident from the figure, only the mode at  $\sim 153 \text{ cm}^{-1}$  (labeled  $L_3$  in Fig. 1(c)) shows asymmetric broadening in the low frequency side with the Fano parameter ( $1/q$ ) of  $\sim -0.15$ , whereas other modes show symmetric Lorentzian lineshape. Red dashed lines are guide to the eye for Raman peak position for the in-plane modes.

## VI. Bulk band structure calculation of $\text{ReS}_2$

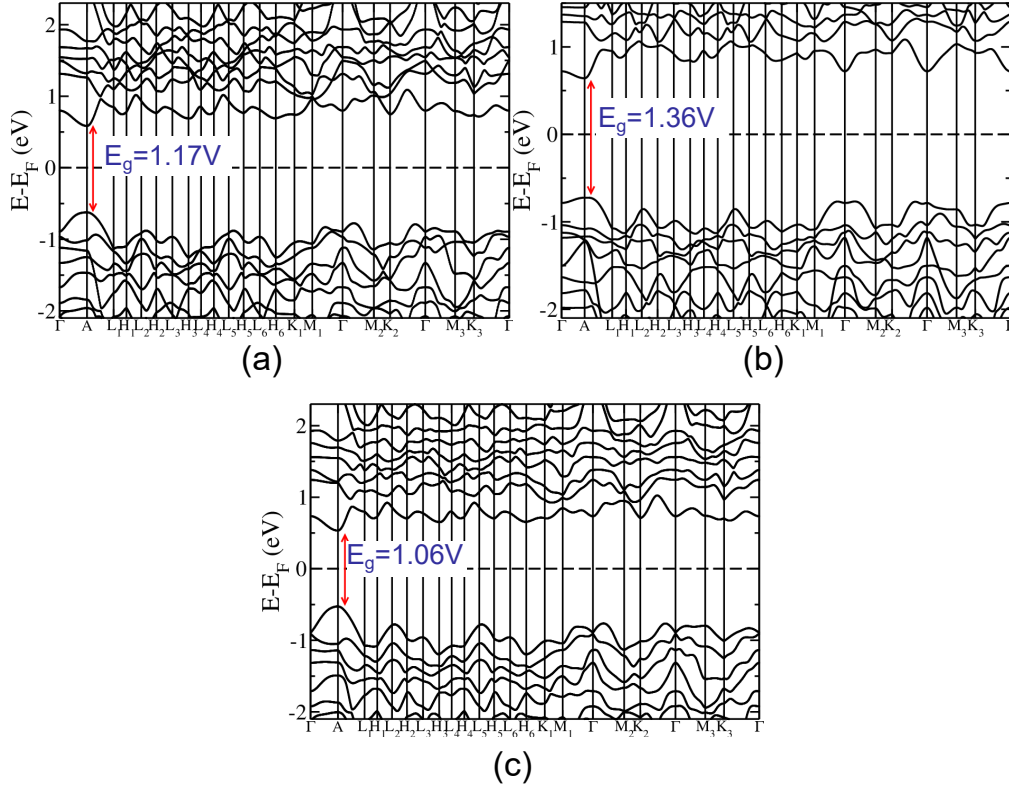

Fig. S10: Electronic band structure of bulk  $\text{ReS}_2$  obtained using (a) LDA-USPP, (b) GGA-USPP and (c) LDA-USPP with SOC inclusion.

## VII. EPC calculation in stacking 3

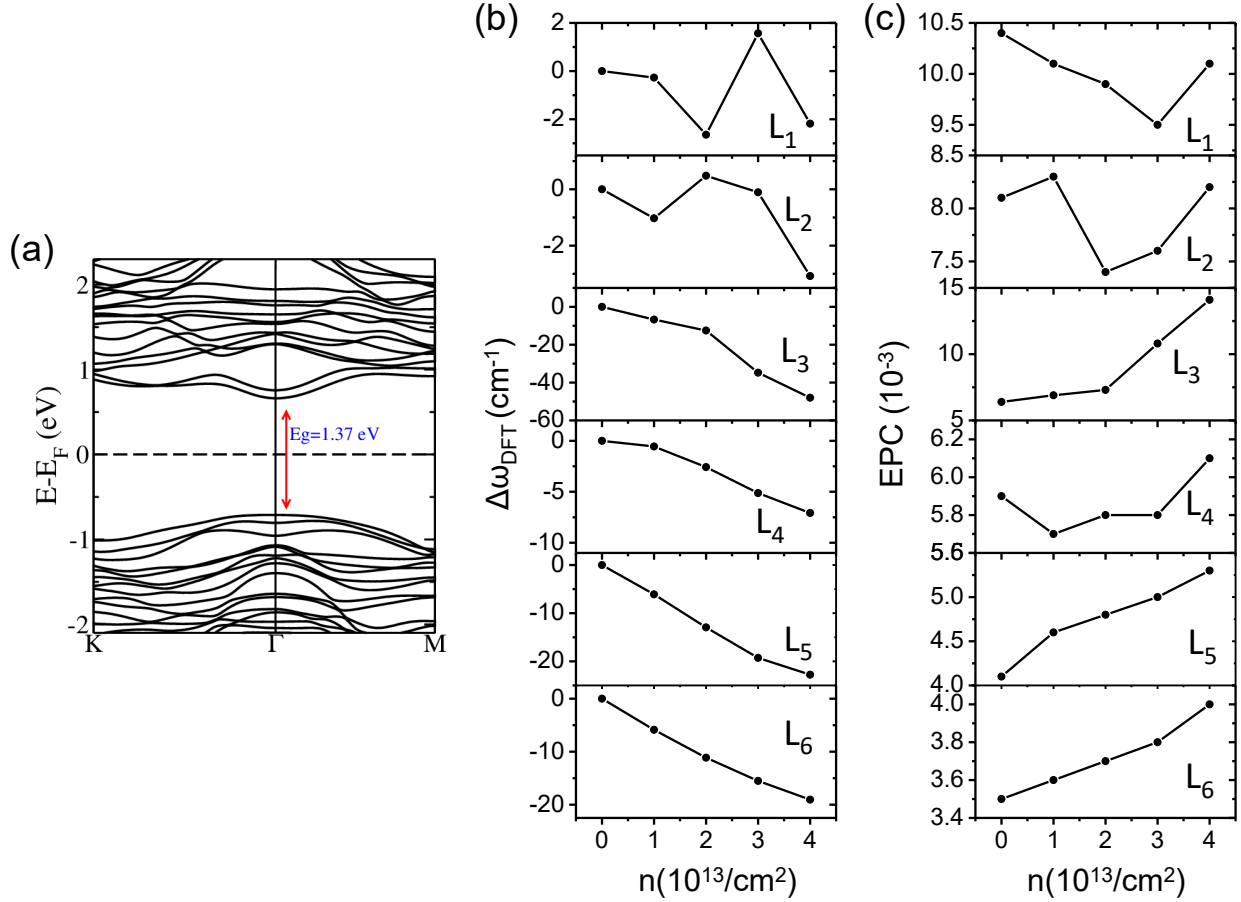

Fig. S11: (a) Electronic band structures of bilayer ReS<sub>2</sub> with stacking 3. (b) Variation in phonon frequencies and (c) electron-phonon coupling with electron doping concentration in bilayer ReS<sub>2</sub> (stacking 3), obtained from first-principles DFT calculations.

- 
- [1] H.-J. Lamfers, A. Meetsma, G. Wieggers, and J. De Boer, *Journal of alloys and compounds* **241**, 34 (1996).
- [2] J. Wildervanck and F. Jelinek, *Journal of the Less Common Metals* **24**, 73 (1971).
- [3] D. Wolverson, S. Crampin, A. S. Kazemi, A. Ilie, and S. J. Bending, *ACS Nano* **8**, 11154 (2014).
- [4] B. Jariwala, D. Voiry, A. Jindal, B. A. Chalke, R. Bapat, A. Thamizhavel, M. Chhowalla, M. Deshmukh, and A. Bhattacharya, *Chemistry of Materials* **28**, 3352 (2016).

- [5] S. Yang, S. Tongay, Y. Li, Q. Yue, J.-B. Xia, S.-S. Li, J. Li, and S.-H. Wei, *Nanoscale* **6**, 7226 (2014).
- [6] H. Zhao, J. Wu, H. Zhong, Q. Guo, X. Wang, F. Xia, L. Yang, P. Tan, and H. Wang, *Nano Research* **8**, 3651 (2015).
